# Supplementary material for: Pulmonary involvement in Fabry disease: effect of plasma globotriaosylsphingosine and time to initiation of enzyme replacement therapy
Source: PubMed Central journal article supplement — BMJ Open Respir Res. 2018 Apr 21;5(1):e000277. doi: 10.1136/bmjresp-2018-000277 (PMC5922571; doi:10.1136/bmjresp-2018-000277), 2018-04-21
Supplement: bmjresp-2018-000277supp001.pdf [file bmjresp-2018-000277supp001.pdf]

Supplementary Table. Genotype, phenotype and serum Lyso-Gb3 levels of the included Fabry patients

**A. Classic Males**

| <b>Age at ERT start</b> | <b>GLA Mutation</b> | <b>Predicted Enzyme Protein Change</b> | <b>Serum Lyso-Gb3 level (ng/ml)</b> |
|-------------------------|---------------------|----------------------------------------|-------------------------------------|
| 35                      | c.744_745delTA      | p.F248LfsX7                            | 92.2                                |
| 40                      | c.744_745delTA      | p.F248LfsX7                            | 74.8                                |
| 27                      | c.370-2A>G          | Cons. Splice Site                      | 36.8                                |
| 31                      | c.370-2A>G          | Cons. Splice Site                      | 57.6                                |
| 38                      | Deletion exon 2     |                                        | 115.0                               |
| 46                      | c.581C>T            | p.T194I                                | 41.0                                |
| 55                      | c.581C>T            | p.T194I                                | 46.1                                |
| 39                      | c.581C>T            | p.T194I                                | 40.0                                |
| 24                      | c.581C>T            | p.T194I                                | 40.4                                |
| 44                      | c.899T>A            | p.L300H                                | 83.0                                |
| 49                      | c.899T>A            | p.L300H                                | 40.1                                |
| 14                      | c.125T>C            | p.M42T                                 | 39.0                                |
| 24                      | c.125T>C            | p.M42T                                 | 35.3                                |
| 28                      | c.827G>A            | p.S276N                                | 45.6                                |
| 26                      | c.1033T>C           | p.S345P                                | 24.7                                |
| 46                      | c.1033T>C           | p.S345P                                | 55.2                                |
| 26                      | c.1055_1057dupCTA   | p.A352_M353insT                        | 71.7                                |
| 38                      | c.613C>T            | p.P205S                                | 17.2                                |

**B. Classic Heterozygotes**

| <b>Age at ERT start</b> | <b>GLA Mutation</b> | <b>Predicted Enzyme Protein Change</b> | <b>Serum Lyso-Gb3 level (ng/ml)</b> |
|-------------------------|---------------------|----------------------------------------|-------------------------------------|
|                         | c.1147_1149del      | p.F383del                              | 10.1                                |
| 30                      | c.744_745delTA      | p.F248LfsX7                            | 5.2                                 |
|                         | c.744_745delTA      | p.F248LfsX7                            | 8.6                                 |

|    |                  |                   |      |
|----|------------------|-------------------|------|
|    | c.581C>T         | p.T194I           | 9.7  |
|    | c.581C>T         | p.T194I           | 10.1 |
| 22 | c.581C>T         | p.T194I           | 8.3  |
| 53 | c.581C>T         | p.T194I           | 17.8 |
|    | c.581C>T         | p.T194I           | 6.1  |
| 52 | c.581C>T         | p.T194I           | 12.0 |
|    | c.1033T>C        | p.S345P           | 7.8  |
|    | c.704C>A         | p.Ser235Tyr       | 8.2  |
| 21 | c.125T>C         | p.M42T            | 8.0  |
| 17 | c.125T>C         | p.M42T            | 7.3  |
| 20 | c.125T>C         | p.M42T            | 7.5  |
| 16 | c.125T>C         | p.M42T            | 8.6  |
| 55 | c.796G>T         | p.D266T           | 8.9  |
| 28 | c.640-3C>G       | Cons. Splice Site | 10.0 |
|    | c.154T>C         | p.C52R            | 5.9  |
| 46 | c.1033T>C        | p.S345P           | 16.5 |
| 36 | c.1235_1236delCT | p.N122IfsX8       | 12.6 |
| 62 | c.1033T>C        | p.S345P           | 16.1 |
| 48 | c.870G>C         | p.M290I           | 0.8  |
| 54 | c.796G>T         | p.D266Y           | 15.9 |
|    | c.1033T>C        | p.S345P           | 7    |
| 52 | c.72G>A          | p.Y24X            | 9.3  |
|    | c.613C->T        | p.W24*            | 13.5 |
| 43 | c.365delA        | p.N122IfsX8       | 23.1 |
| 35 | c.901C>T         | p.R301X           | 10.7 |

### C. Later-Onset Males

| Age at ERT start | GLA Mutation | Predicted Enzyme Protein Change | Serum Lyso-Gb3 level (ng/ml) |
|------------------|--------------|---------------------------------|------------------------------|
| 62               | c.644A>G     | p.N215S                         | 5.3                          |
|                  | c.1196G>C    | p.W399S                         | 2.0                          |

|    |          |         |     |
|----|----------|---------|-----|
| 36 | c.902G>A | p.R301Q | 7.5 |
| 72 | c.902G>A | p.R301Q | 15  |

#### **D. Later-Onset Heterozygotes**

| <b>Age at ERT start</b> | <b>GLA Mutation</b> | <b>Predicted Enzyme Protein Change</b> | <b>Serum Lyso-Gb3 level (ng/ml)</b> |
|-------------------------|---------------------|----------------------------------------|-------------------------------------|
| 68                      | c.902G>A            | p.R301Q                                | 4.9                                 |
|                         | c.902G>A            | p.R301Q                                | 5.2                                 |
|                         | c.337T>C            | p.F113L                                | 1.6                                 |
